# Supplementary material
Source: publisher figshare collection journal article supplement (https://acs.figshare.com/ndownloader/files/17422484)
Supplement: Supplementary file 1 [file 17422484]

## ***Supporting Information.***

### **Exploiting Synergistic Effects of Intermolecular Interactions to Synthesize Hybrid Rejuvenators to Revitalize Aged Asphalt**

Farideh Pahlavan <sup>a</sup>, Alireza Samieadel <sup>a</sup>, Shuguang Deng <sup>b</sup>, Elham Fini<sup>a\*</sup>

\* Corresponding author. e-mail: [efini@asu.edu](mailto:efini@asu.edu), Phone: 480-965-4273 (E. H. Fini).

a. School of Sustainable Engineering and the Built Environment, Arizona State University, 660 S. College Avenue, Tempe, AZ 85287-3005, USA

b. School for Engineering of Matter, Transport and Energy, Arizona State University, 551 E. Tyler Mall, Tempe, AZ 85287, USA

Supporting Information (SI) includes 6 pages, 2 figures, and 1 table illustrating details of molecular structure and background information.

### **Molecular Species in the Bio-Rejuvenator Made from Swine Manure and Algae**

Decomposition of a lipid-rich source such as swine manure generates compounds with higher molecular weight, including long chains of fatty acids and saturated and unsaturated linear hydrocarbons.<sup>1, 2</sup> The presence of nitrogen-containing components in the form of cyclic and acyclic molecules such as indoles, quinolones, amines, and amides is the predominant feature of bio-crude oil from protein-rich biomass, such as algae, which is related to amino acid transformation through the HTL process.<sup>3-6</sup> Amino acids decompose via decarboxylation and deamination reactions and consequently produce amines and amides.<sup>7-9</sup> Some products (ammonia and amines) undergo a condensation reaction with fatty acids, the building blocks of the lipids, to give alkyl amides and nitriles.<sup>10, 11</sup> Also, interactions between amines and carbohydrates produce the nitrogen-containing rings such as indoles and quinolones in the bio-oil.<sup>12, 13</sup>

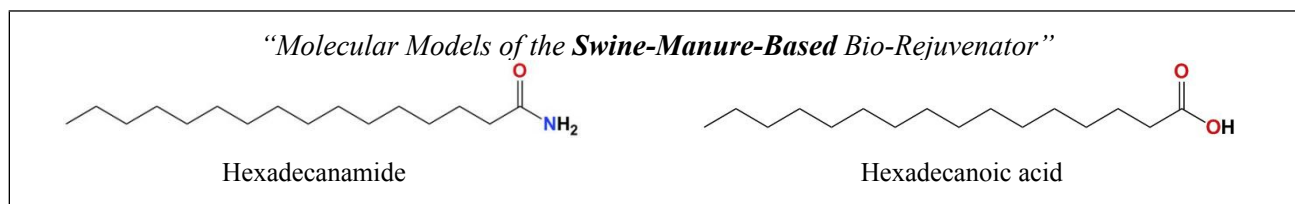

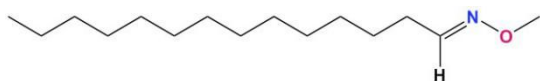

Tetradecanal o-methyloxime

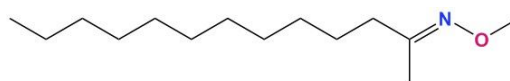

2-tridecanone o-methyloxime,

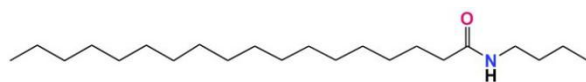

n-butyl octadecanamide

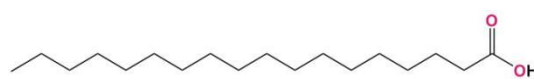

Octadecanoic acid

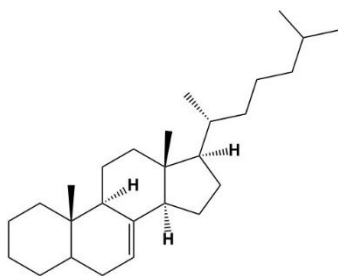

Cholest-7-ene

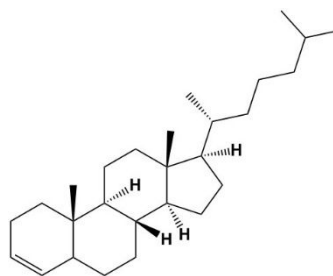

Cholest-3-ene

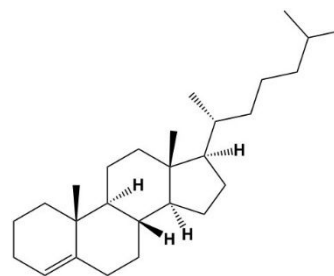

Cholest-4-ene

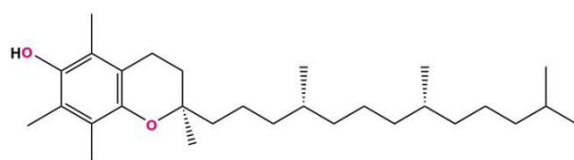

α-Tocopherol

*“Molecular Models of the Algae-Based Bio-Rejuvenator”*

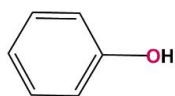

Phenol

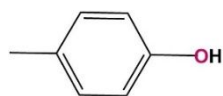

p-Cresol

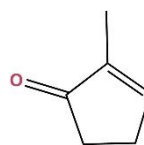

2-Methyl-2-cyclopenten-1-one

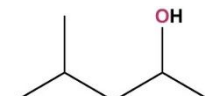

4-Methyl-2-pentanol

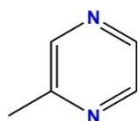

Methylpyrazine

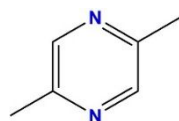

2,5-dimethylpyrazine

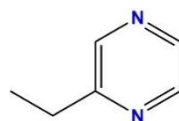

2-Ethylpyrazine

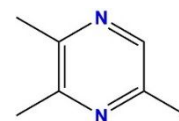

2,3,5-Trimethylpyrazine

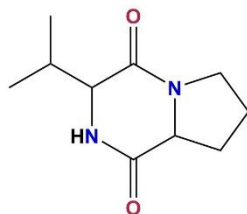

Cyclo(L-prolyl-L-valine)

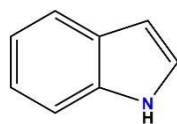

Indole

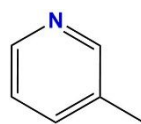

3-Methylpyridine

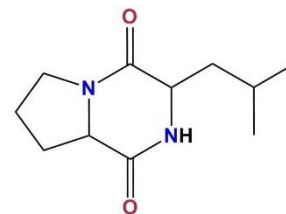

Pyrrolo[1,2-a]pyrazine-1,4-dione,  
hexahydro-3-(2-methylpropyl)-

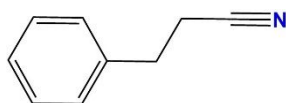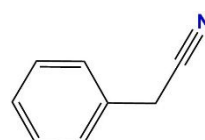

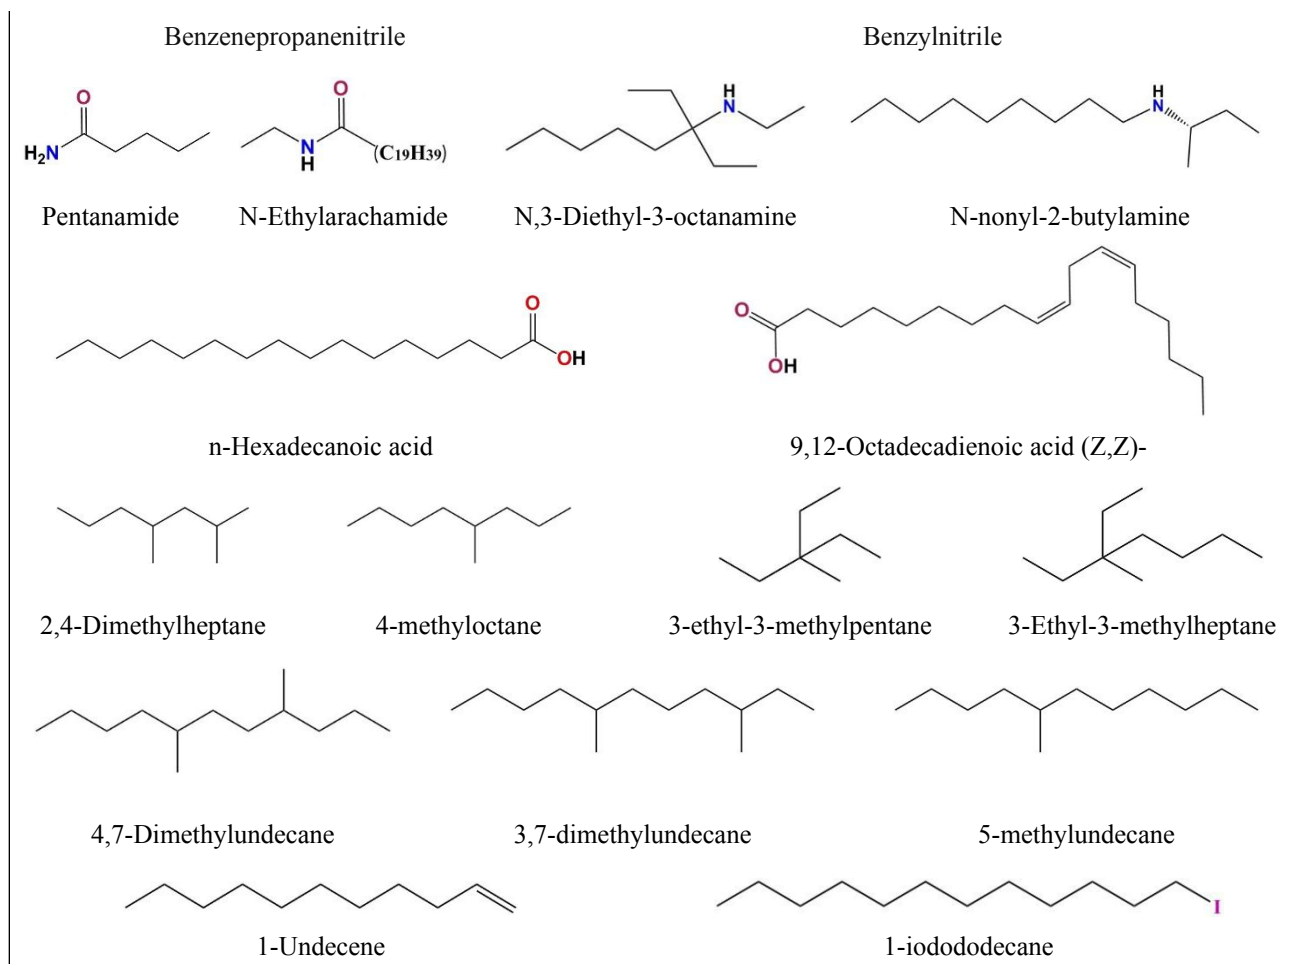

**Figure S1.** Molecular structures identified in swine-manure-based and algae-based bio-binders.

### Intercalating Potential of the Primary and Secondary Amides, BR1 and BR2

Additional structural features whose impact on deagglomeration should be studied are the different types of amides: primary (BR1) and secondary (BR2) (Figure 2). We compared the interacting potential of the primary and secondary amides, BR1 and BR2, respectively, at Zone-C. In the secondary amide, the functional group is located between two hydrocarbon chains, so it is expected that BR2 would have more dispersion interaction from both sides of the molecular structure with the aromatic cores and subsequently more penetration into the intersheet gap in comparison with BR1. This expectation was verified in our computations for the interacting complex of an oxidized asphaltene dimer and BR2 (Table S1). The reduction in the binding energy and the increase in the binding distance of oxidized dimer of asphaltene

exposed to secondary amide (Table S1) is more than that of the primary amide (Figure 5-b). It can be expected that secondary amide molecules are more effective in the deagglomeration of asphaltene stacks in the intercalation step compared to the primary one.

**Table S1. Intercalating Step:** Interacting complex to evaluate the penetrating ability and opening impact of secondary amide, BR2, on the asphaltene agglomerates. Shown are the binding energy ( $E_{\text{bind}}$ , kcal/mol) and the binding distance for the oxidized dimer ( $d_{\text{bind}}$ , Å).

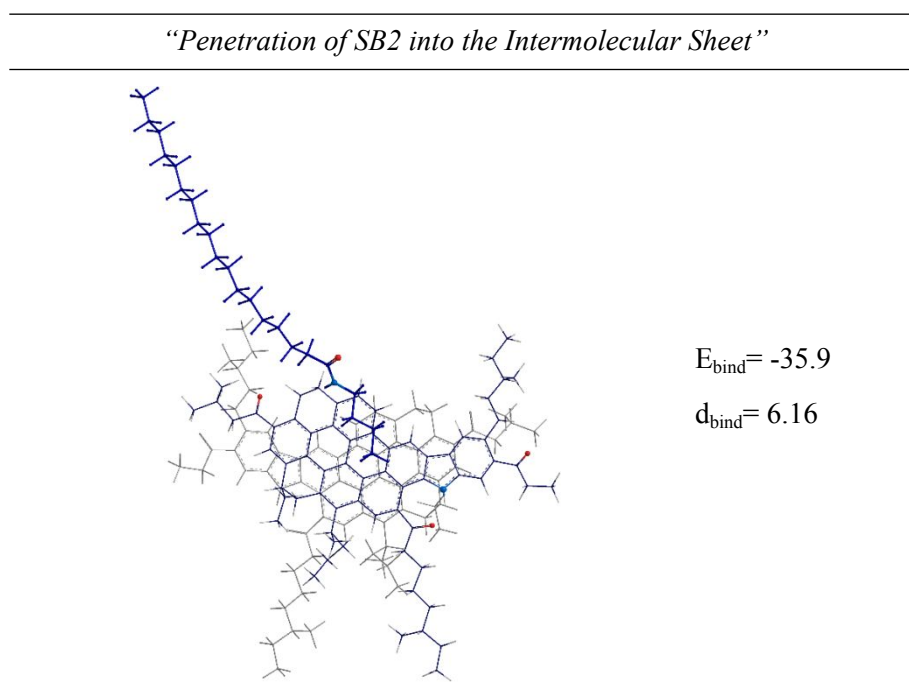

***Density plot for population of data points falling in each range of average aggregation number***

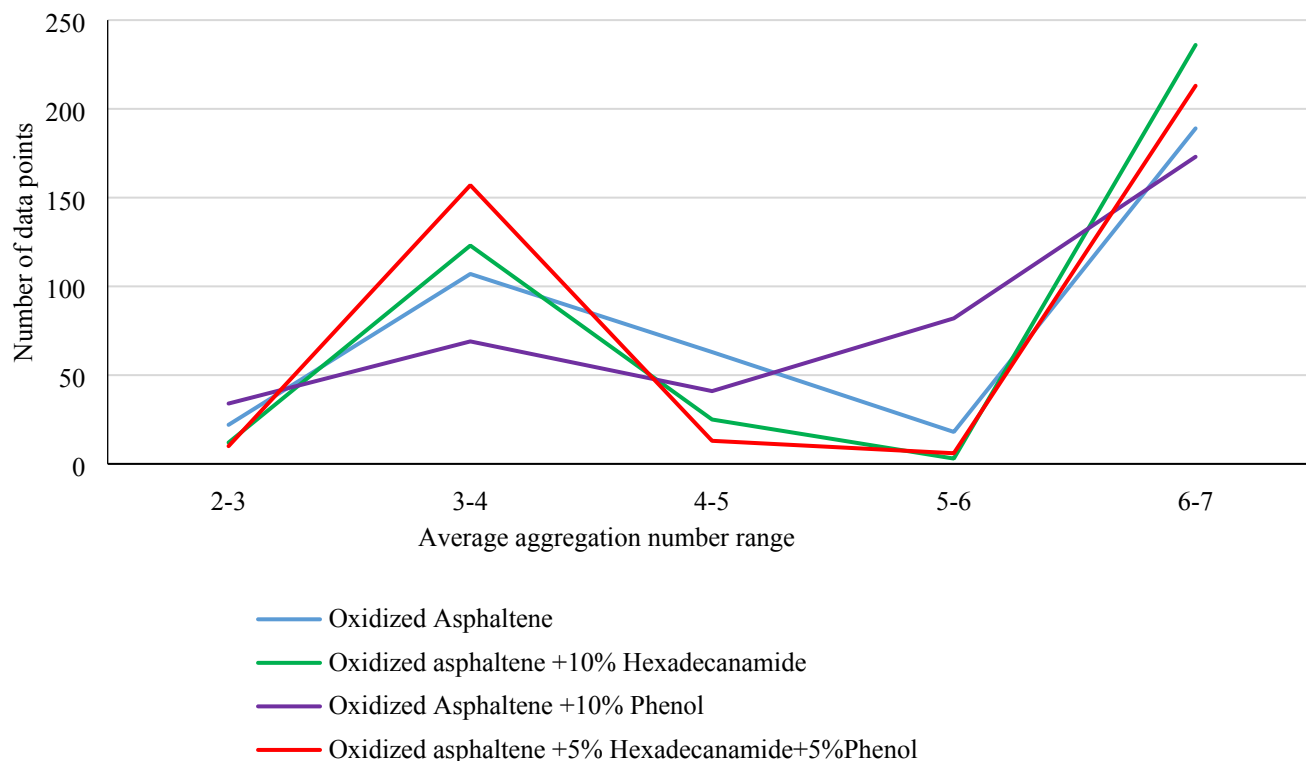

**Figure S2.** Density plot for data points calculated for average aggregation number from 20 to 40 ns (after addition of dopants).

## References

1. Wang, K., Pyrolysis and catalytic pyrolysis of protein-and lipid-rich feedstock. **2014**.
2. Maher, K.; Bressler, D., Pyrolysis of triglyceride materials for the production of renewable fuels and chemicals. *Bioresource technology* **2007**, *98* (12), 2351-2368.
3. Guo, Y.; Yeh, T.; Song, W.; Xu, D.; Wang, S., A review of bio-oil production from hydrothermal liquefaction of algae. *Renewable and Sustainable Energy Reviews* **2015**, *48*, 776-790.
4. Du, Z.; Hu, B.; Ma, X.; Cheng, Y.; Liu, Y.; Lin, X.; Wan, Y.; Lei, H.; Chen, P.; Ruan, R., Catalytic pyrolysis of microalgae and their three major components: carbohydrates, proteins, and lipids. *Bioresource technology* **2013**, *130*, 777-782.
5. Kebelmann, K.; Hornung, A.; Karsten, U.; Griffiths, G., Intermediate pyrolysis and product identification by TGA and Py-GC/MS of green microalgae and their extracted protein and lipid components. *Biomass and bioenergy* **2013**, *49*, 38-48.

6. Chagas, B. M.; Dorado, C.; Serapiglia, M. J.; Mullen, C. A.; Boateng, A. A.; Melo, M. A.; Ataíde, C. H., Catalytic pyrolysis-GC/MS of Spirulina: evaluation of a highly proteinaceous biomass source for production of fuels and chemicals. *Fuel* **2016**, *179*, 124-134.
7. Sato, N.; Quitain, A. T.; Kang, K.; Daimon, H.; Fujie, K., Reaction kinetics of amino acid decomposition in high-temperature and high-pressure water. *Industrial & Engineering Chemistry Research* **2004**, *43* (13), 3217-3222.
8. Toor, S. S.; Rosendahl, L.; Rudolf, A., Hydrothermal liquefaction of biomass: a review of subcritical water technologies. *Energy* **2011**, *36* (5), 2328-2342.
9. Klingler, D.; Berg, J.; Vogel, H., Hydrothermal reactions of alanine and glycine in sub-and supercritical water. *The Journal of Supercritical Fluids* **2007**, *43* (1), 112-119.
10. Simoneit, B. R.; Rushdi, A.; Bin Abas, M.; Didyk, B., Alkyl amides and nitriles as novel tracers for biomass burning. *Environmental science & technology* **2003**, *37* (1), 16-21.
11. Torri, C.; Garcia Alba, L.; Samori, C.; Fabbri, D.; Brilman, D. W., Hydrothermal treatment (HTT) of microalgae: detailed molecular characterization of HTT oil in view of HTT mechanism elucidation. *Energy & Fuels* **2012**, *26* (1), 658-671.
12. Kruse, A.; Krupka, A.; Schwarzkopf, V.; Gamard, C.; Henningsen, T., Influence of proteins on the hydrothermal gasification and liquefaction of biomass. 1. Comparison of different feedstocks. *Industrial & Engineering Chemistry Research* **2005**, *44* (9), 3013-3020.
13. Kruse, A.; Maniam, P.; Spieler, F., Influence of proteins on the hydrothermal gasification and liquefaction of biomass. 2. Model compounds. *Industrial & Engineering Chemistry Research* **2007**, *46* (1), 87-96.
